1 **Misalignment between circadian preference and accelerometer-derived actual sleep-**  
2 **wake cycle is associated with increased risk of cardiometabolic diseases: a prospective**  
3 **cohort study in UK Biobank**

4 Yue Chen<sup>1</sup>, MSc; Tingting Geng<sup>2</sup>, MD, PhD; Xinming Xu<sup>1</sup>, B.S.; Zhicheng Zhang<sup>1</sup>, MSc;  
5 Lili Huang<sup>1</sup>, PhD; Haiyang Dong<sup>1</sup>, B.S.; Huan Yu<sup>4,5,6</sup>, MD, PhD; Xiang Gao<sup>1\*</sup>, MD, PhD;  
6 Liang Sun<sup>1\*</sup>, MD, PhD;

7

8 <sup>1</sup> Department of Nutrition and Food Hygiene, School of Public Health, Institute of Nutrition,  
9 Clinical Research Unit, Institute of Clinical Medicine, Zhongshan Hospital, Fudan  
10 University, Shanghai, China

11 <sup>2</sup> Department of Epidemiology and Biostatistics, Ministry of Education Key Laboratory of  
12 Environment and Health, School of Public Health, Tongji Medical College, Huazhong  
13 University of Science and Technology, Wuhan, Hubei Province, China

14 <sup>3</sup> Sleep and Wake Disorders Center of Fudan University, Shanghai, China

15 <sup>4</sup> Department of Neurology, Huashan Hospital, Fudan University, Shanghai, China

16 <sup>5</sup> National Center for Neurological Disorders, Huashan Hospital, Fudan University, Shanghai,  
17 China

18

19 \* Corresponding authors:

20 Liang Sun, MD, PhD

21 Department of Nutrition and Food Hygiene, School of Public Health, Institute of Nutrition,

22 Clinical Research Unit, Institute of Clinical Medicine, Zhongshan Hospital, Fudan

NOTE: This preprint reports new research that has not been certified by peer review and should not be used to guide clinical practice.

23 University, 130 Dongan Rd, Shanghai 200032, China; Email: [sun\\_liang@fudan.edu.cn](mailto:sun_liang@fudan.edu.cn)

24 Xiang Gao, MD, PhD

25 Department of Nutrition and Food Hygiene, School of Public Health, Institute of Nutrition,

26 Clinical Research Unit, Institute of Clinical Medicine, Zhongshan Hospital, Fudan

27 University, 130 Dongan Rd, Shanghai 200032, China; Email: [xiang\\_gao@fudan.edu.cn](mailto:xiang_gao@fudan.edu.cn)

28

29

30 **Short title:** circadian misalignment and cardiometabolic diseases

31 **Word count:** 8436 (including Title Page, Abstract, Text, References, Tables and Figures

32 Legends)

33 **Abstract (349 words)**

34 **Background:** Evidence has linked several circadian disruption indicators, such as social  
35 jetlag and shift work, to adverse health outcomes, however, associations of misalignment  
36 between circadian preference and actual sleep-wake cycle with cardiometabolic diseases  
37 (CMDs) remains unclear. We aimed to prospectively investigate the associations of the  
38 circadian misalignment with CMDs including type 2 diabetes (T2D), chronic heart diseases  
39 (CHD), and stroke, and to uncover potential mechanisms linking circadian misalignment and  
40 CMDs.

41 **Methods:** A total of 60,965 participants from the UK Biobank study without baseline CMDs  
42 and followed-up for an average of 7.9 years were included in the current analysis. Circadian  
43 misalignment was defined as discrepancies between self-reported chronotype and  
44 accelerometer-derived midpoint of sleep to detect its association with CMDs. Incident CMDs  
45 were derived from primary care, hospital inpatient, death registry, and self-reported source of  
46 data. Cox proportional hazards regression models were used to compute the hazard ratio (HR)  
47 and confidence intervals (CIs) on the association between circadian misalignment (quintiles  
48 of residuals of midsleep on chronotype) and incident CMDs.

49 **Results:** U-shaped associations were found of the circadian misalignment with incident T2D  
50 and CHD after adjusting the potential confounders. Compared to individuals with aligned  
51 midsleep and circadian preferences (Q3), those with advanced and delayed circadian  
52 misalignment had higher risks of T2D [HR (95%CI) 1.22 (1.03, 1.45) in Q1 and 1.39 (1.18,  
53 1.62) in Q5]. However, only delayed circadian misalignment was significantly associated  
54 with an increased risk of CHD [HR (95%CI) 1.15 (1.01, 1.31) in Q4 and 1.16 (1.02, 1.33) in

55 Q5]. Liver function, lipid and glucose metabolism, and inflammatory markers partially  
56 explained the observed circadian misalignment and CMDs association (mediation proportion  
57 12.3-44.6% for T2D, 8.8-20.5% for CHD). Moreover, the association between delayed  
58 circadian misalignment and CMDs was more prominent in women (for T2D,  $P_{interaction}=0.03$ )  
59 and in younger adults (for CHD,  $P_{interaction}=0.02$ ) compared to their counterparts.  
60 Additionally, early chronotype [HR (95%CI): 1.19 (1.06, 1.34)] rather than late chronotype  
61 was associated with an increased risk of incident T2D.

62 **Conclusion:** Both advanced and delayed circadian misalignment were associated with  
63 increased risks of CMDs, suggesting potential benefits of aligning actual sleep-wake cycles  
64 with individual circadian preferences.

65

66 **Keywords:** circadian misalignment, chronotype, diabetes, cardiometabolic diseases, UK  
67 Biobank

68

69

## 70 **Novelty and Significance**

### 71 **What is known?**

- 72 • Cardiometabolic diseases such as type 2 diabetes, coronary heart disease, and  
73 cerebrovascular diseases have become major concerns in global public health over  
74 recent decades.
- 75 • Evidence has linked several circadian disruption indicators to adverse health  
76 outcomes: People living with late chronotype (circadian preference), late sleep  
77 timing, long social jetlag (the difference between midsleep on work-free days and  
78 work days), and shift work were prone to introduce circadian disruptions and had  
79 higher risks of cardiometabolic diseases.
- 80 • Little is known about whether and how the misalignment between circadian  
81 preference and actual sleep-wake cycle is associated with cardiometabolic  
82 diseases, particularly in large prospective cohort studies.

### 83 **What New Information Does This Article Contribute?**

- 84 • This is the first study to propose a new metrics (misalignment between circadian  
85 preference and actual sleep-wake cycle) to shed some lights on quantifying human  
86 circadian disruption in general population of differed work schedule and in  
87 population with less disrupted circadian rhythm.
- 88 • Both advanced and delayed sleep-wake cycle comparing to individual circadian  
89 preference were associated with increased risks of cardiometabolic diseases.

90 Population may benefit from keeping an actual sleep-wake cycle in accordance

91 with their circadian preference.

92 • Early chronotype rather than late chronotype were found to associate with an

93 increased risk of incident T2D, independent of actual sleep-wake cycle.

94 • Age and sex modified the associations between circadian misalignment and

95 cardiometabolic diseases, while liver function, lipid and glucose metabolism, and

96 inflammatory markers partially mediated the associations.

## 97 **Introduction**

98 Cardiometabolic diseases (CMDs) such as type 2 diabetes (T2D), coronary heart  
99 disease (CHD), and cerebrovascular diseases have become major concerns in global  
100 public health over recent decades<sup>1</sup>. The multifactorial nature of the etiology of these  
101 diseases involves a complex interplay of genetic, lifestyle, and environmental factors,  
102 presenting great challenges on the prevention and prognosis of CMDs<sup>2</sup>. Therefore,  
103 more efforts are needed to develop potential strategies to combat this escalating  
104 phenomenon.

105 Circadian disruption indicated a wide range of misalignment upon individual  
106 internal-internal timing as well as internal-external rhythm<sup>3</sup>. In field-based studies,  
107 metrics for circadian disruption mainly rely on rest-activity measurement and  
108 disrupted sleep behavior, e.g., social jetlag and shift work<sup>3</sup>. Epidemiological evidence  
109 suggested that people living with late chronotype (circadian preference), late sleep  
110 timing, long social jetlag (the difference between midsleep on work-free days and  
111 work days), and shift work were prone to introduce circadian disruptions<sup>4</sup> and had  
112 higher risks of CMDs<sup>5-9</sup>. However, current widely used proxies for circadian  
113 disruption (such as social jetlag and shift work) either largely require regular work  
114 schedule, or lack of generalizability to the general population who works non-shift  
115 and less deviated from internal clock<sup>10</sup>. In addition, the majority of prior  
116 epidemiological studies on circadian disruptions and CMDs were cross-sectional  
117 designs<sup>6, 11, 12</sup>, only very limited prospective analysis was conducted in large  
118 population<sup>13</sup>. Furthermore, advancements in sensor element technology and

119 accelerometer now allow the objective measurement of human sleep-wake cycle,  
120 physical activity, and ambient environmental zeitgebers. Unlike biomarkers that  
121 objectively measured human circadian rhythm requiring repeated or invasive  
122 procedures<sup>14, 15</sup>, accelerometers enable a non-intrusive way to consistent tracking rest-  
123 activity cycles<sup>14-16</sup>. Notably, over 80% population in a large database (the Munich  
124 ChronoType Questionnaire database) reported using an alarm clock and accumulated  
125 sleep debts during working week<sup>17</sup>, indicating a large proportion of population suffer  
126 from misalignment between circadian preference and their actual sleep-wake cycle.  
127 However, little is known about whether and how the misalignment between circadian  
128 preference and actual sleep-wake cycle is associated with CMDs, particularly in large  
129 prospective cohort studies.

130 Thus, based on a large-scale cohort study, the UK Biobank, we used the  
131 information on accelerometer-derived sleep-wake cycle, the self-reported circadian  
132 preference, and comprehensive diseases diagnosis resources 1) to prospectively  
133 analyze the association of circadian misalignment with CMDs such as T2D, CHD,  
134 and stroke, and 2) to reveal the potential mechanism underlying the relationship  
135 between circadian misalignment and CMDs, through mediation analysis by plasma  
136 biomarkers and anthropometric indices.

137

## 138 **Methods**

### 139 **Study design and participants**

140 The UK Biobank, initiated in 2006-2010, is a large-scale prospective cohort study



141 containing comprehensive health information from over half a million adult UK  
142 participants. The UK Biobank was granted ethical approval from the North West  
143 Multi-center Research Ethical Committee (reference # 11/NW/0382) and research is  
144 performed in accordance with the Declaration of Helsinki. This research has been  
145 conducted using the UK Biobank Resource under application number 96083.

146 Among 502,505 participants at baseline in the UK Biobank, 74,123 participants  
147 with complete and valid information on both baseline sleep questionnaire and  
148 accelerometer derived information were included, after further excluding 7,052  
149 participants with prevalent diabetes, stroke, or CHD at the time of monitoring activity,  
150 389 participants with baseline random glucose level  $\geq 11.1$  mmol/L or HbA1c  $\geq 48$   
151 mmol/mol, 5,418 participants reported jobs involves shift work, and 299 participants  
152 with measured sleep duration  $< 4$  hours or  $> 12$  hours, 60,965 participants were  
153 included in final analysis (**Figure 1**).

154

## 155 **Sleep assessment**

156 Sleep status was evaluated through both subjective touchscreen sleep questionnaires  
157 and objective actigraphy monitors.

### 158 *Sleep questionnaire*

159 At baseline recruitment, information on personal chronotype, 24h sleep duration,  
160 snoring, insomnia, and daytime sleepiness was collected by a self-administrated  
161 touchscreen sleep questionnaire. They were collected by the following questions: “Do  
162 you consider yourself to be? (definitely a ‘morning’ person, more a ‘morning’ person

163 than an ‘evening’ person, more an ‘evening’ person than a ‘morning’ person,  
164 definitely an ‘evening’ person, do not know, prefer not to answer)”, “About how many  
165 hours sleep do you get in every 24 hours? (please include naps)”, “Does your partner  
166 or a close relative or friend complain about your snoring? (yes, no, do not know,  
167 prefer not to answer)”, “Do you have trouble falling asleep at night or do you wake up  
168 in the middle of the night? (never/rarely, sometimes, usually, prefer not to answer)”,  
169 How likely are you to doze off or fall asleep during the daytime when you don’t mean  
170 to? (e.g., when working, reading or driving) (never/rarely, sometimes, often, do not  
171 know, prefer not to answer, all of the time)”. For all the above questions, answers with  
172 “do not know”, “prefer not to answer” were considered as missing. Healthy sleep  
173 quality score was calculated from questionnaire derived chronotype, insomnia, snore,  
174 daytime sleepiness, and sleep duration, see **Supplementary TableS1**.

175

### 176 *Actigraphy*

177 During June 2013 and January 2016, physical activity and sleep measurements were  
178 recorded via a wrist-worn accelerometer (Axivity AX3), which is a commercial  
179 version of the Open Movement AX3 open-source sensor  
180 (<https://github.com/digitalinteraction/openmovement> ) designed by Open Lab,  
181 Newcastle University. Exquisite processes on data collection and curation have been  
182 described previously<sup>18</sup>. Briefly, participants were instructed to wear the accelerometer  
183 upon receipt and proceed with their usual routines, affixing it to their dominant wrist.  
184 They were notified that the device would activate automatically upon delivery and

185 deactivate after a week. At the end of this period, participants returned the device to  
186 the central office using a provided pre-paid envelope. R package GGIR was used to  
187 clearing, calibrating, and deriving information on timing of sleep, moderate to  
188 vigorous physical activity, and light exposure<sup>19, 20</sup>.

189

## 190 **Ascertainment of circadian misalignment**

191 The morning-evening preference, chronotype, was collected by one validated question  
192 from the Horne and Östberg Morningness-Eveningness Questionnaire (MEQ)<sup>21</sup>. This  
193 question indicated a good correlation with the overall score of the MEQ ( $r = 0.72$ )<sup>22</sup>,  
194 and was also employed in other large cohort studies to indicate individual circadian  
195 preference<sup>13, 23</sup>. Additionally, information on participants timing of onset and end of  
196 sleep was collected by wearing an actigraphy on dominant wrist through seven  
197 consecutive days and derived by R package GGIR. Nighttime sleep duration was  
198 calculated as the difference between time point of sleep end and sleep onset. Midsleep  
199 of weekdays, weekend, and weekly average can be calculated using the following  
200 formula, using the average value of sleep onset and sleep duration on weekdays,  
201 weekend, and the whole week, respectively.

$$Midsleep = sleep_{onset} + \frac{1}{2} sleep_{duration}$$

202 The misalignment between circadian preference (chronotype) and midsleep was  
203 calculated as the residuals of midsleep on chronotype or the difference between  
204 midsleep and chronotype (subtracting group numbers of chronotype from midsleep)<sup>24</sup>,  
205 detailed calculation and categorization can be found in **Supplementary Method**.

206

## 207 **Cardiometabolic outcomes**

208 Newly onset of T2D, CHD, and stroke (including ischemic stroke and hemorrhage  
209 stroke subtypes) were individually evaluated and collectively considered when  
210 calculating CMD incidence. Data on data showcase-first occurrence (Category 1712)  
211 were used to derive the first occurrence date of diseases. Two main classification  
212 systems of clinical coding were used in the linked health data: International  
213 Classification of Diseases (ICD) and Read. Information on primary cares (Read v2  
214 and Read CTV3), hospital inpatient (ICD10 and ICD9), death register (ICD10),  
215 cancer register (ICD10 and ICD9), and self-reported medical condition were gathered  
216 and mapped to 3-character ICD-10 to ascertain the source and date of the first  
217 occurrence of diseases. Detailed method can be found here  
218 ([https://biobank.ndph.ox.ac.uk/showcase/ukb/docs/first\\_occurrences\\_outcomes.pdf](https://biobank.ndph.ox.ac.uk/showcase/ukb/docs/first_occurrences_outcomes.pdf)).

219 ICD code and field ID of outcomes were described in **Supplementary table S2**.

220 Incident cases were defined as cases with a later date of first occurrence in  
221 comparison with the date of measurement of baseline information and accelerometer.

222

## 223 **Covariates**

224 Baseline information on demographic and socioeconomic status (age, sex, education,  
225 Townsend deprivation index, region, ethnic group, employment status) and family  
226 history of diseases were collected in assessment center when participants were  
227 initially recruited. Lifestyle factors including drinking and smoking status, tea and

228 coffee intake, as well as a detailed 29-item food frequency questionnaire on dietary  
229 intakes were also evaluated in assessment center by touchscreen questionnaire. Diet  
230 intake information was converted to a Mediterranean diet score to indicate dietary  
231 quality<sup>25</sup>.  
232 Additionally, baseline body weight, height, waist circumference, hip circumference,  
233 and blood pressure were measured in assessment center under standard process. Body  
234 mass index was calculated as weight (kg) divided by height (m) squares, and waist-  
235 hip-ratio was also calculated. Blood samples were collected at recruitment, separated  
236 by components and stored at UK Biobank ( $-80^{\circ}\text{C}$  and LN2). Sample collection and  
237 processing has been previously described in detail  
238 ([https://biobank.ndph.ox.ac.uk/showcase/ukb/docs/biomarker\\_issues.pdf](https://biobank.ndph.ox.ac.uk/showcase/ukb/docs/biomarker_issues.pdf)). A range of  
239 key biochemistry markers (hepatic and renal function, inflammatory cytokines, lipids  
240 and glucose metabolism) were used in the current analysis. Levels of glucose and  
241 HbA1c at baseline were employed to identify participants with prevalent diabetes.  
242 Levels of Low-Density Lipoprotein was also used in analysis, as it was closely related  
243 to cardiometabolic outcomes<sup>26</sup>.

244

#### 245 **Statistical analysis**

246 All statistical analyses were performed using SAS 9.4 (SAS Institute Inc) and R  
247 version 3.4.2. Two-sided  $P < 0.05$  were regarded as the level of significance.  
248 Descriptive data of participants at baseline were shown as number (%) for categorical  
249 variables and mean (standard deviation) for continuous variables. See

250 **Supplementary Method** for the adjusted circadian misalignment according to  
251 baseline characteristics and selection of covariates in the following models.

252 Cox proportional hazard models were used to investigate the associations  
253 between circadian misalignment (quintiles of residuals of midsleep on chronotype)  
254 and incident cardiometabolic events. All cox models have passed the proportional  
255 hazards assumption by Schoenfeld Residuals Test. Model 1 was adjusted for age  
256 (tertiles), sex (men/women), and ethnic group (White British/Non-White British), and  
257 Model 2 was additionally adjusted for region (urban/town/village), Townsend  
258 deprivation index (tertiles), employment (in-paid employment/retired/without fixed  
259 employment), qualification (college or university degree/A levels or equivalent/O  
260 levels or GCSEs or equivalent/none of the above), and ambient noise level (tertiles).  
261 Model 3 (main model) was further adjusted for smoking status (never/ever/current),  
262 drinking status (never/ever/current), tea consumption (<2/2-4/≥5 cups), coffee  
263 consumption (0/0-2/≥3 cups), accelerometer-derived moderate to vigorous physic  
264 activity (tertiles), and healthy sleep quality score (<2/2-3/>3). All continuous  
265 covariates were converted to tertiles to clearer show their relationship with circadian  
266 misalignment (Figure S1) and CMDs. Since missing values for all covariates were  
267 less than 6% (5.9% for healthy sleep quality score, and 1.2% for ambient noise level,  
268 and less than 0.2% for other covariates), they were imputed as the mode<sup>12</sup>. Plots on  
269 restricted cubic splines (four knots on 0.05, 0.35, 0.65, and 0.95, respectively) and *P*  
270 for nonlinear (ANOVA test<sup>27</sup>) were used to show the nonlinear relationship between  
271 circadian misalignment and cardiometabolic events. Moreover, risk of

272 cardiometabolic events were also evaluated by circadian misalignment using  
273 difference between midsleep and chronotype (advanced/intermediate/delayed group),  
274 as well as chronotype and midsleep individually. When investigating the association  
275 of midsleep and chronotype with CMDs, they were further mutually adjusted.

276 Sensitivity analyses were conducted by 1) recategorizing the main exposure,  
277 circadian misalignment (residuals of midsleep on chronotype), into three groups  
278 [advanced (Q1), intermediate (Q2+Q3+Q4), delayed (Q5) group]; 2) recalculating the  
279 main exposure, circadian misalignment, as the absolute value of the residuals of  
280 midsleep on chronotype, and categorized it into tertiles. The linear trend of HRs over  
281 tertiles was assessed by  $\chi^2$  test using these tertile numbers as continuous variables; 3)  
282 based on main model (Model 3), additionally adjusted for family history of diabetes  
283 (when outcome is T2D), family history of cardiovascular diseases (when outcome is  
284 stroke and CHD), or family history of diabetes and cardiovascular diseases (when  
285 outcome is CMDs), and time span between baseline recruitment and accelerometer  
286 assessment, as they were suggested confounders in previous studies. Age was adjusted  
287 in the form of continuous variable to reduce potential residual confounding; 4) Based  
288 on main model, further adjusted for BMI, LDL, and SBP, as they may act both as  
289 underlying mediators and confounders; 5) excluding upper and lower 0.5% value of  
290 residuals of midsleep on circadian preference; 6) calculating propensity score to  
291 balance the distribution of baseline characteristics among differed circadian  
292 misalignment group. Propensity score weights for multiple treatments and average  
293 treatment effect on the treated was calculated by the R package Twang and using the

294 method of gradient boosting machine<sup>29,30</sup>; 7) using ICD-10 code E11 instead of  
295 pooling E11 and E14 together to define T2D; and 8) including participants who  
296 worked with shift work in analysis, as shift work was an important contributor of  
297 circadian misalignment.

298 In secondary analysis, causal mediation analyses were conducted by R package  
299 CMAverse<sup>28</sup>. Average total effect hazard ratio, nature direct hazard ratio, nature  
300 indirect hazard ratio, and proportion mediated by potential mediators were shown.  
301 Mediators were log-transformed and standardized to show HRs (95% CI) per standard  
302 deviation. Proportional hazards assumptions were also confirmed. See  
303 **Supplementary Method** for the selection of potential mediators. Furthermore,  
304 subgroup analyses were conducted by age (<57 /≥57 years (median)), sex  
305 (women/men), ethnic (White British/non-White British), residence (Urban/town or  
306 village), socioeconomic status (<median/≥median), and healthy sleep quality score  
307 (<4/≥4). The multiplicative interaction between characteristics and circadian  
308 misalignment was also detect by additionally adding an interaction term to the model.  
309

## 310 **Results**

### 311 **Baseline characteristics and risk factors of delayed circadian misalignment**

312 60,965 participants aged 39 to 70 years at baseline were included in analysis.  
313 Compared to advanced circadian misalignment group, participants of delayed  
314 circadian misalignment group were prone to be older, women, and non-White British.  
315 They were more likely to live in urban areas and be exposed to higher ambient noise



316 level, have lower education levels and socioeconomic status, and work without pay.  
317 In terms of lifestyle, participants predisposed to delayed circadian misalignment  
318 tended to be current smokers and drinkers, engage in less moderate to vigorous  
319 physical activity, drink more tea and less coffee, and have worse sleep quality (**Table**  
320 **1 and Figure S1**).

321

### 322 **Association between circadian misalignment and incident cardiometabolic events**

323 During an average follow-up of 7.86 years, 1,526 (2.50%), 684 (1.12%), and 2,186  
324 (3.59%) participants developed incident T2D, stroke, and CHD, respectively, yielding  
325 an overall 4,084 (6.70%) participants developing CMDs in total.

326 After fully adjustment in main model (Model 3), compared to individuals with  
327 matched midsleep and circadian preferences (Q3), both the advanced and delayed  
328 circadian misalignment were associated with higher type 2 diabetes [HR (95%CI)  
329 1.22 (1.03, 1.45) in Q1 and 1.39 (1.18, 1.62) in Q5] and CMDs [HR (95%CI) 1.12  
330 (1.02, 1.25) in Q1 and 1.21 (1.10, 1.33) in Q5]. However, only delayed circadian  
331 misalignment (Q4 and Q5) was significantly related to increased risk of CHD [HR  
332 (95%CI) 1.15 (1.01, 1.31) in Q4 and 1.16 (1.02, 1.33) in Q5] (**Table 2**). Circadian  
333 misalignment was not associated with incidence of stroke or stroke subtypes (**Table 2**  
334 and **Table S3**). When calculating circadian misalignment by the difference between  
335 midsleep and chronotype, participants with delayed circadian misalignment had  
336 higher risk of developing T2D [HR (95%CI): 1.19 (1.06, 1.33)] and CMD [HR  
337 (95%CI): 1.10 (1.03, 1.17)]. Consistently, neither type of circadian misalignment was

338 associated with incidence of stroke (**Figure 2**).

339 The “U-shaped” nonlinear associations of circadian misalignment with T2D  
340 ( $P_{nonlinear}<0.001$ ), CHD ( $P_{nonlinear}=0.03$ ), and CMD ( $P_{nonlinear}<0.001$ ) were significantly  
341 revealed through RCS plots (**Figure S2**). To detect the robustness of the relationship  
342 between circadian misalignment and cardiometabolic outcomes, sensitivity analyses  
343 were conducted and yielded consistent results (**Table S4, Table S5, Figure S3**).  
344 In stratified analysis, consistent results among different ethnicity, residence,  
345 socioeconomic status, and sleep quality subgroups were displayed. Notably, the  
346 association between delayed circadian misalignment and CMDs was more prominent  
347 in women (for T2D,  $P_{interaction}=0.03$ ) or in population aged younger than 57 years, the  
348 average age (for CHD,  $P_{interaction}=0.02$ ) compared to their counterparts (**Figure S4**).

349

### 350 **Mediation analysis on the relationship between circadian misalignment and** 351 **incident cardiometabolic events**

352 Mediation analysis indicated that liver function, blood lipid and glucose metabolism,  
353 inflammatory factors, and anthropometric indices were associated with both circadian  
354 misalignment and CMDs, independent of demographic, socioeconomics, and lifestyle  
355 factors (**Table S6-S8**). Among them, anthropometric indices including BMI, WHR,  
356 and blood pressure introduced the largest proportion of mediation effect (44.6%)  
357 between circadian misalignment and T2D, whereas liver function, blood lipids and  
358 glucose metabolism, and inflammatory factors mediated 12.3%, 24.5%, 20.0%  
359 association between circadian misalignment and T2D, respectively (**Table 3**). As for

360 CHD, liver function, blood lipids and glucose metabolism, inflammatory factors, and  
361 anthropometric indices introduced 8.8%, 9.1%, 13.7%, and 20.5% of mediation  
362 effects between circadian misalignment and CHD, respectively (**Table 3**).

363

364 **Association between other circadian rhythm proxies and incident**

365 **cardiometabolic events**

366 After multiple adjustments, early chronotype [HR (95%CI): 1.19 (1.06, 1.34)] and late  
367 midsleep [1.21 (1.07, 1.36)] were both associated with increased risk of incident T2D.

368 Meanwhile, neither chronotype nor midsleep was associated with CHD or stroke

369 (**Figure 2**). Notably, the significant association [HR (95%CI) 1.22 (1.03, 1.44)]

370 between late chronotype and T2D disappeared after further adjusting for midsleep

371 [1.08 (0.91, 1.28)].

372 **Discussion**

373 In this large-scale population-based cohort study, we proposed a new metrics for  
374 circadian misalignment by calculating the discrepancy between circadian preference  
375 and accelerometer-derived actual sleep-wake cycle, and prospectively revealed a U-  
376 shaped association of circadian misalignment with T2D and CHD. Our results  
377 indicated that both advanced and delayed sleep-wake cycle in relation to individual  
378 circadian preference were associated with increased risks of CMDs, although the  
379 association was stronger in the delayed than the advanced group.

380 Our findings on the relationship between circadian misalignment and CMDs  
381 were consistent with previous cross-sectional studies regarding circadian disruption  
382 (social jetlag<sup>6</sup>, shift work<sup>11</sup>, or alignment between light cycle and sleep cycle<sup>12</sup>),  
383 although circadian misalignment in this study was measured by different metrics.  
384 Additionally, the Nurses' Health Study also revealed similar prospective association  
385 between circadian misalignment (chronotype and shift work) and T2D<sup>13, 23</sup>. Unlike  
386 most studies that focusing on chronotype<sup>9</sup> and shift work<sup>7</sup> individually, the Nurses'  
387 Health Study<sup>13</sup> was the first large cohort study to detect circadian misalignment by  
388 examining the interaction between chronotype and shift work, revealing that an  
389 increased risk of T2D was predominantly emerged in nurses with long night shifts and  
390 an early chronotype, and was also seen in participants with long daytime work but a  
391 late chronotype. However, it remains unclear whether the mismatch between  
392 chronotype and actual sleep-wake cycle was associated with adverse health outcomes,  
393 especially in population working non-shift and less-deviated from their internal clock.

394 Our findings by considering both circadian preference and actual sleep-wake cycle,  
395 were in line with, and further expanded these discoveries in a more quantified manner  
396 regarding circadian disruption and in both men and women population.

397 To date, shift work and social jetlag were the most commonly used proxies for  
398 circadian disruption in large scale population-based studies<sup>3</sup>. Other less-employed  
399 metrics such as composite phase deviation<sup>10</sup> and delayed onset of melatonin either  
400 lack employment in large population or imposed considerable burdens on study  
401 subjects<sup>14, 15</sup>. Participants working night shift<sup>11, 31</sup> is a commonly used metrics for  
402 circadian disruption, not only for its easily-collected nature but also for having the  
403 highest levels of deviation relative to internal clock<sup>3</sup>. Night shifts represent the most  
404 strenuous shift for most individuals, however, the association of circadian disruption  
405 on diseases for vast non-shift workers with less disturbed disruption also merits to be  
406 explored. On the other hand, since put forward in 2006, social jetlag has been widely  
407 used as a good proxy for circadian disruption, and has been associated with various  
408 adverse health outcomes<sup>32</sup>. It was defined by the discrepancy between social clock  
409 and biological clock while employ midpoint of sleep on work days and work-free  
410 days to respectively indicate the above two clocks. However, sleep compensation<sup>33</sup>  
411 made it hard to accurately indicate biological clock by midsleep on work-free days.  
412 Moreover, it is not suitable for population of retired or without fixed work. The  
413 metrics of circadian misalignment in our analyses was defined by the discordance  
414 between self-reported circadian preference and actual sleep-wake cycle, it could be  
415 analyzed as a continuous variable to detect the U-shaped relationship between

416 circadian misalignment and CMDs. It is also able to characterize circadian disruption  
417 on population of non-shiftwork, retired, and without fixed work.

418 We additionally revealed that early chronotype, rather than late chronotype, was  
419 associated with increased risk of T2D, which was inconsistent with previous  
420 evidence<sup>23, 34</sup>. Cross-sectional studies<sup>35, 36</sup> and limited prospective cohort study<sup>23</sup>  
421 revealed that late or evening chronotype were associated with higher risk of disrupted  
422 glucose homeostasis and T2D. However, to our knowledge, most existing studies<sup>35, 36</sup>  
423 did not explore if the relationship between chronotype and health outcomes was  
424 independent of actual sleep-wake cycle. Our analysis indicated that after adjusting for  
425 sleep-wake cycle, the risk association of late chronotype decreased to null.

426 Meanwhile, one large prospective analysis also revealed that participants reporting a  
427 "definite evening" chronotype were more likely to exhibit unhealthy lifestyle, which  
428 might largely explain the association with increased diabetes risk<sup>23</sup>. Thus, the  
429 association between late chronotype and T2D may at least partially explained by late  
430 sleep-wake cycle. Notably, a previous analysis conducted in UKB population also  
431 suggested that "definite morning" was associated with higher risk of CMDs, when  
432 classifying participants into four groups (definite morning, morning, evening, definite  
433 evening)<sup>37</sup>. However, most studies<sup>8, 13</sup> generally categorized the chronotype into two  
434 or three groups, making it challengeable to reveal the nonlinear relationship between  
435 chronotype and health outcomes, which are needed to be confirmed in future studies.

436 The potential mechanism between circadian misalignment and CMDs remains  
437 unclear. A recent compendium highlighted several diurnal and circadian mechanisms

438 underlying cardiovascular and cerebrovascular diseases<sup>38</sup>: Circadian misalignment  
439 may affect immune function to promote systemic inflammation and exacerbate  
440 cardiovascular damage<sup>39</sup>. There is also evidence that circadian misalignment increases  
441 the risk of cardiovascular events by causing hypoxia and myocardial ischemia-  
442 reperfusion injury<sup>40</sup>. Besides, molecular and physiological processes that regulate  
443 cardiovascular metabolism could also be associated with circadian misalignment  
444 through the interaction of circadian genes (*CLOCK*, *BMAL1*, *period*, *timeless*, *CRY*,  
445 etc.) and signaling pathways such as classic signal-response coupling (termed  
446 reactionary mechanisms) or temporally orchestrate metabolic pathways in  
447 preparation for predicted stimuli/stresses (termed anticipatory mechanisms)<sup>41</sup>. We  
448 found that the association between circadian misalignment and CMDs may at least  
449 partially mediated by liver function, lipid metabolism, inflammatory factors, and most  
450 prominently, BMI and WHR, which may shed some light on the potential mechanism  
451 linking circadian misalignment with cardiometabolic health outcomes. Moreover,  
452 effect modification of sex on the relationship of circadian misalignment with CHD  
453 and T2D was also revealed, which may be due to the sexual dimorphism of the  
454 metabolism that contributed to sex differences in CMDs<sup>42</sup>. Meanwhile, age-related  
455 variations in gut microbiota and metabolic profiling<sup>43</sup> may partially explain the  
456 modulatory role of age on the circadian misalignment-CMD associations.  
457 Additionally, we also found that women and older participants were more likely to  
458 have delayed circadian misalignment in our study, which was associated with  
459 increased risk of CMDs.

460 To our knowledge, this is the first study to examine the association between  
461 misalignment of circadian preference and actual sleep-wake cycle and  
462 cardiometabolic events. Moreover, validated accelerometers were employed to  
463 objectively measure participants' sleep-wake cycles, whereas previous measurements  
464 of sleep-wake cycles, especially in prospective studies, were mostly based on the  
465 questionnaires<sup>44</sup>.

466 Despite the above strengths, several limitations were also worth noting. In  
467 addition to the relatively older age as well as higher socioeconomic status of UKB  
468 participants, measurement bias may generate from accelerometer derived sleep-  
469 timing, as accelerometer detected inactivity time rather than sedentary time<sup>45</sup>.  
470 However, good agreements (89-97%) between accelerometer-derived sleep status and  
471 polysomnography have been verified<sup>46</sup>, and comparing to waist-worn, the wrist-worn  
472 placement could improve capability of assessing sleep behaviors<sup>47</sup>. Moreover, self-  
473 reported circadian preference based on a single question from MEQ was employed.  
474 As a most widely used and easily collected circadian indicator, validity of MEQ score  
475 in relation to objectively measured circadian markers<sup>48</sup>, as well as that of this question  
476 to overall score<sup>22</sup> has been fully investigated. Another limitation is that there is an  
477 average 5.8 years of difference between the measurement of circadian preference and  
478 real sleep-wake cycle. However, evidence has revealed circadian preference is a  
479 relatively stable characteristic for human being<sup>5</sup>. Besides, we included the time gap  
480 between them as a potential confounder in sensitivity analysis and also tested the  
481 interaction between the time gap and major exposures, which resulted no effect



482 modification. A previous study in UK Biobank also indicated most of basic  
483 characteristics did not change overtime<sup>49</sup>. Moreover, because only one measurement  
484 on actual sleep-wake cycle was conducted, eternal time bias may happen when  
485 participants change their usual sleep-wake time. In addition, using a simple time point  
486 on midsleep to indicate sleep-wake cycle may lose detailed information on the phase  
487 and amplitude of this cycle. Nevertheless, it is an easy way to refer to sleep-wake  
488 cycle and subsequently to calculate circadian misalignment, and is appropriate for  
489 conducting circadian measurement on large-scale population studies<sup>17</sup>. Lastly, due to  
490 the observational nature and the possibility of residual confounding, our study could  
491 not establish causality.

492 In conclusion, both advanced or delayed circadian misalignment were associated  
493 with increased risk of cardiometabolic events. Population may benefit from keeping  
494 an actual sleep-wake cycle in accordance with their circadian preference. This study  
495 proposed a new metrics regarding circadian disruption, and may shed some light on  
496 the prevention and management of population with high risk of developing  
497 cardiometabolic events. Our results are needed to be confirmed by further studies that  
498 objectively measure personal circadian preference.

499

500 **Author contribution:**

501 YC, XG, and LS conceived and designed this study. YC, XX, ZZ, and HD researched  
502 data. YC, XX and LH analyzed the data. YC, TG, HY, XG and LS interpreted the  
503 results and drafted the manuscript. XG and LS supervised the study. All authors

504 contributed to the review and revision of the manuscript and agree to be accountable  
505 for all aspects of work ensuring integrity and accuracy.

506

507 **Acknowledgement:**

508 The most important acknowledgement is to the participants in UK Biobank and the  
509 members of the UK Biobank teams, as well as to all members of team of the current  
510 analysis for their valuable help. The authors also appreciate the helpful comments on  
511 this manuscript provided by the reviewers and editors.

512

513 **Sources of funding:**

514 This study was funded by the Major Project of the Ministry of Science and  
515 Technology of China (2023YFC2506704) and the Startup grant from Fudan  
516 University (JIF201068Y and IDF201026Y).

517

518 **Disclosures:**

519 The authors declare no conflict of interest.

520

521 **Data availability:**

522 This research has been conducted using the UK Biobank Resource under Application  
523 Number 96083. Data from UK Biobank is accessible to eligible researchers via  
524 applying to [www.ukbiobank.ac.uk](http://www.ukbiobank.ac.uk).

525

526 **Ethic approval:**

527 The UK Biobank was granted ethical approval from the North West Multi-center

528 Research Ethical Committee (reference # 11/NW/0382) and research is performed in

529 accordance with the Declaration of Helsinki.

530 **Reference**

- 531 1. Stefan N and Schulze MB. Metabolic health and cardiometabolic risk clusters:  
532 implications for prediction, prevention, and treatment. *Lancet Diabetes Endocrinol.*  
533 2023;11:426-440.
- 534 2. Poveda A, Chen Y, Brändström A, Engberg E, Hallmans G, Johansson I, Renström F,  
535 Kurbasic A and Franks PW. The heritable basis of gene-environment interactions in  
536 cardiometabolic traits. *Diabetologia.* 2017;60:442-452.
- 537 3. Vetter C. Circadian disruption: What do we actually mean? *The European journal of*  
538 *neuroscience.* 2020;51:531-550.
- 539 4. Fishbein AB, Knutson KL and Zee PC. Circadian disruption and human health. *The*  
540 *Journal of clinical investigation.* 2021;131.
- 541 5. Roenneberg T, Pils LK, Zerbini G and Winnebeck EC. Chronotype and Social Jetlag: A  
542 (Self-) Critical Review. *Biology.* 2019;8.
- 543 6. Cespedes Feliciano EM, Rifas-Shiman SL, Quante M, Redline S, Oken E and Taveras  
544 EM. Chronotype, Social Jet Lag, and Cardiometabolic Risk Factors in Early Adolescence.  
545 *JAMA pediatrics.* 2019;173:1049-1057.
- 546 7. Kecklund G and Axelsson J. Health consequences of shift work and insufficient sleep.  
547 *BMJ (Clinical research ed).* 2016;355:i5210.
- 548 8. Lin K, Song M and Giovannucci E. Evening Chronotype, Circadian Misalignment, and  
549 Metabolic Health: Implications for Diabetes Prevention and Beyond. *Annals of internal*  
550 *medicine.* 2023;176:1422-1423.
- 551 9. Reutrakul S, Hood MM, Crowley SJ, Morgan MK, Teodori M, Knutson KL and Van

- 552 Cauter E. Chronotype is independently associated with glycemic control in type 2 diabetes.  
553 *Diabetes care*. 2013;36:2523-9.
- 554 10. Fischer D, Vetter C and Roenneberg T. A novel method to visualise and quantify  
555 circadian misalignment. *Scientific reports*. 2016;6:38601.
- 556 11. Sooriyaarachchi P, Jayawardena R, Pavey T and King NA. Shift work and the risk for  
557 metabolic syndrome among healthcare workers: A systematic review and meta-analysis.  
558 *Obesity reviews : an official journal of the International Association for the Study of Obesity*.  
559 2022;23:e13489.
- 560 12. Xiao Q, Durbin J, Bauer C, Yeung CHC and Figueiro MG. Alignment Between 24-h Light-  
561 Dark and Activity-Rest Rhythms Is Associated With Diabetes and Glucose Metabolism in a  
562 Nationally Representative Sample of American Adults. *Diabetes care*. 2023;46:2171-2179.
- 563 13. Vetter C, Devore EE, Ramin CA, Speizer FE, Willett WC and Schernhammer ES.  
564 Mismatch of Sleep and Work Timing and Risk of Type 2 Diabetes. *Diabetes care*.  
565 2015;38:1707-13.
- 566 14. Braun R, Kath WL, Iwanaszko M, Kula-Eversole E, Abbott SM, Reid KJ, Zee PC and  
567 Allada R. Universal method for robust detection of circadian state from gene expression.  
568 *Proceedings of the National Academy of Sciences of the United States of America*.  
569 2018;115:E9247-e9256.
- 570 15. Wittenbrink N, Ananthasubramaniam B, Munch M, Koller B, Maier B, Weschke C, Bes F,  
571 de Zeeuw J, Nowozin C, Wahnschaffe A, Wisniewski S, Zaleska M, Bartok O, Ashwal-Fluss R,  
572 Lammert H, Herzel H, Hummel M, Kadener S, Kunz D and Kramer A. High-accuracy  
573 determination of internal circadian time from a single blood sample. *The Journal of clinical*

- 574 *investigation*. 2018;128:3826-3839.
- 575 16. Meyer N, Harvey AG, Lockley SW and Dijk DJ. Circadian rhythms and disorders of the  
576 timing of sleep. *Lancet (London, England)*. 2022;400:1061-1078.
- 577 17. Roenneberg T. How can social jetlag affect health? *Nature reviews Endocrinology*.  
578 2023;19:383-384.
- 579 18. Doherty A, Jackson D, Hammerla N, Plötz T, Olivier P, Granat MH, White T, van Hees  
580 VT, Trenell MI, Owen CG, Preece SJ, Gillions R, Sheard S, Peakman T, Brage S and  
581 Wareham NJ. Large Scale Population Assessment of Physical Activity Using Wrist Worn  
582 Accelerometers: The UK Biobank Study. *PloS one*. 2017;12:e0169649.
- 583 19. Migueles J, Rowlands A, Huber F, Sabia S and van Hees V. GGIR: A Research  
584 Community-Driven Open Source R Package for Generating Physical Activity and Sleep  
585 Outcomes From Multi-Day Raw Accelerometer Data. *Journal for the Measurement of Physical  
586 Behaviour*. 2019;2:188-196.
- 587 20. van Hees VT, Sabia S, Anderson KN, Denton SJ, Oliver J, Catt M, Abell JG, Kivimäki M,  
588 Trenell MI and Singh-Manoux A. A Novel, Open Access Method to Assess Sleep Duration  
589 Using a Wrist-Worn Accelerometer. *PloS one*. 2015;10:e0142533.
- 590 21. Horne JA and Ostberg O. A self-assessment questionnaire to determine morningness-  
591 eveningness in human circadian rhythms. *International journal of chronobiology*. 1976;4:97-  
592 110.
- 593 22. Megdal SP and Schernhammer ES. Correlates for poor sleepers in a Los Angeles high  
594 school. *Sleep medicine*. 2007;9:60-3.
- 595 23. Kianersi S, Liu Y, Guasch-Ferré M, Redline S, Schernhammer E, Sun Q and Huang T.

- 596 Chronotype, Unhealthy Lifestyle, and Diabetes Risk in Middle-Aged U.S. Women : A  
597 Prospective Cohort Study. *Annals of internal medicine*. 2023;176:1330-1339.
- 598 24. Chatterjee S, Cook RD and Weisberg S. Residuals and Influence in Regression. 1982.
- 599 25. Trichopoulou A, Costacou T, Bamia C and Trichopoulos D. Adherence to a  
600 Mediterranean diet and survival in a Greek population. *The New England journal of medicine*.  
601 2003;348:2599-608.
- 602 26. Holmes MV, Ala-Korpela M and Smith GD. Mendelian randomization in cardiometabolic  
603 disease: challenges in evaluating causality. *Nature reviews Cardiology*. 2017;14:577-590.
- 604 27. Jianhua ZH, Charles K, Charles JS and Young KT. Functional ANOVA modeling for  
605 proportional hazards regression. *The Annals of Statistics*. 2000;28:961-999.
- 606 28. Shi B, Choirat C, Coull BA, VanderWeele TJ and Valeri L. CMAverse: A Suite of  
607 Functions for Reproducible Causal Mediation Analyses. *Epidemiology (Cambridge, Mass)*.  
608 2021;32:e20-e22.
- 609 29. McCaffrey DF, Griffin BA, Almirall D, Slaughter ME, Ramchand R and Burgette LF. A  
610 tutorial on propensity score estimation for multiple treatments using generalized boosted  
611 models. *Statistics in medicine*. 2013;32:3388-414.
- 612 30. Griffin BA, Sanchez R, Cefalu M, Ayer L, Coffman DL, Vegetabile BG, Pane JD, Burgette  
613 LF and McCaffrey DF. Toolkit for Weighting and Analysis of Nonequivalent Groups. *Santa  
614 Monica, Calif: RAND Corporation, TL-A570-2*. 2020.
- 615 31. Drake CL, Roehrs T, Richardson G, Walsh JK and Roth T. Shift work sleep disorder:  
616 prevalence and consequences beyond that of symptomatic day workers. *Sleep*.  
617 2004;27:1453-62.

- 618 32. Wittmann M, Dinich J, Mellow M and Roenneberg T. Social jetlag: misalignment of  
619 biological and social time. *Chronobiology international*. 2006;23:497-509.
- 620 33. Arora T, Chen MZ, Cooper AR, Andrews RC and Taheri S. The Impact of Sleep Debt on  
621 Excess Adiposity and Insulin Sensitivity in Patients with Early Type 2 Diabetes Mellitus.  
622 *Journal of clinical sleep medicine : JCSM : official publication of the American Academy of*  
623 *Sleep Medicine*. 2016;12:673-80.
- 624 34. Fan M, Sun D, Zhou T, Heianza Y, Lv J, Li L and Qi L. Sleep patterns, genetic  
625 susceptibility, and incident cardiovascular disease: a prospective study of 385 292 UK  
626 biobank participants. *Eur Heart J*. 2020;41:1182-1189.
- 627 35. Lotti S, Pagliai G, Colombini B, Sofi F and Dinu M. Chronotype Differences in Energy  
628 Intake, Cardiometabolic Risk Parameters, Cancer, and Depression: A Systematic Review with  
629 Meta-Analysis of Observational Studies. *Advances in nutrition (Bethesda, Md)*. 2022;13:269-  
630 281.
- 631 36. Tan X, Ciuculete DM, Schiöth HB and Benedict C. Associations between chronotype,  
632 MTNR1B genotype and risk of type 2 diabetes in UK Biobank. *Journal of internal medicine*.  
633 2020;287:189-196.
- 634 37. Knutson KL and von Schantz M. Associations between chronotype, morbidity and  
635 mortality in the UK Biobank cohort. *Chronobiology international*. 2018;35:1045-1053.
- 636 38. Lo EH and Faraci FM. Circadian Mechanisms in Cardiovascular and Cerebrovascular  
637 Disease. *Circulation research*. 2024;134:615-617.
- 638 39. Zeng Q, Oliva VM, Moro MÁ and Scheiermann C. Circadian Effects on Vascular  
639 Immunopathologies. *Circulation research*. 2024;134:791-809.



- 640 40. Sartor F, Ferrero-Bordera B, Haspel J, Sperandio M, Holloway PM and Merrow M.  
641 Circadian Clock and Hypoxia. *Circulation research*. 2024;134:618-634.
- 642 41. Lal H, Verma SK, Wang Y, Xie M and Young ME. Circadian Rhythms in Cardiovascular  
643 Metabolism. *Circulation research*. 2024;134:635-658.
- 644 42. Couch CA, Ament Z, Patki A, Kijpaisalratana N, Bhave V, Jones AC, Armstrong ND,  
645 Cushman M, Kimberly WT and Irvin MR. Sex-Associated Metabolites and Incident Stroke,  
646 Incident Coronary Heart Disease, Hypertension, and Chronic Kidney Disease in the  
647 REGARDS Cohort. *J Am Heart Assoc*. 2024;13:e032643.
- 648 43. Yoshimoto S, Mitsuyama E, Yoshida K, Odamaki T and Xiao JZ. Enriched metabolites  
649 that potentially promote age-associated diseases in subjects with an elderly-type gut  
650 microbiota. *Gut microbes*. 2021;13:1-11.
- 651 44. Roenneberg T, Allebrandt KV, Merrow M and Vetter C. Social jetlag and obesity. *Current*  
652 *biology : CB*. 2012;22:939-43.
- 653 45. Gao Z, Liu W, McDonough DJ, Zeng N and Lee JE. The Dilemma of Analyzing Physical  
654 Activity and Sedentary Behavior with Wrist Accelerometer Data: Challenges and  
655 Opportunities. *Journal of clinical medicine*. 2021;10.
- 656 46. Chase JD, Busa MA, Staudenmayer JW and Sirard JR. Sleep Measurement Using Wrist-  
657 Worn Accelerometer Data Compared with Polysomnography. *Sensors (Basel, Switzerland)*.  
658 2022;22.
- 659 47. Fairclough SJ, Noonan R, Rowlands AV, Van Hees V, Knowles Z and Boddy LM. Wear  
660 Compliance and Activity in Children Wearing Wrist- and Hip-Mounted Accelerometers.  
661 *Medicine and science in sports and exercise*. 2016;48:245-53.

662 48. Kennaway DJ. The dim light melatonin onset across ages, methodologies, and sex and

663 its relationship with morningness/eveningness. *Sleep*. 2023;46.

664 49. Strain T, Wijndaele K, Dempsey PC, Sharp SJ, Pearce M, Jeon J, Lindsay T, Wareham

665 N and Brage S. Wearable-device-measured physical activity and future health risk. *Nature*

666 *medicine*. 2020;26:1385-1391.

667

**Table1. Baseline characteristics of 60965 study participants from UK Biobank according to circadian misalignment<sup>a</sup>**

|                                                                                               | Circadian misalignment <sup>b</sup> |                                    |                            |
|-----------------------------------------------------------------------------------------------|-------------------------------------|------------------------------------|----------------------------|
|                                                                                               | Advanced group<br>(N=12358)         | Intermediate<br>group<br>(N=36464) | Delayed group<br>(N=12143) |
| <b>Basic information and lifestyle factors</b>                                                |                                     |                                    |                            |
| <b>Women (%)</b>                                                                              | 7088 (57.4)                         | 22449 (61.6)                       | 7466 (61.5)                |
| <b>Urban area (%)</b>                                                                         | 10141 (82.9)                        | 30038 (83.1)                       | 10283 (85.6)               |
| <b>Age at baseline (years)</b>                                                                | 54.4 (8.2)                          | 56.1 (7.8)                         | 57.5 (7.2)                 |
| <b>Townsend deprivation index<sup>c</sup></b>                                                 | -1.7 (2.8)                          | -1.9 (2.7)                         | -1.5 (2.9)                 |
| <b>Level of education (%)</b>                                                                 |                                     |                                    |                            |
| College or University degree                                                                  | 5522 (44.7)                         | 17084 (46.9)                       | 5231 (43.1)                |
| A levels/AS levels or Equivalent                                                              | 1674 (13.6)                         | 4837 (13.3)                        | 1595 (13.1)                |
| O levels/GCSEs or Equivalent                                                                  | 2504 (20.3)                         | 7343 (20.1)                        | 2448 (20.2)                |
| None of the above                                                                             | 2658 (21.5)                         | 7200 (19.8)                        | 2869 (23.6)                |
| <b>White British (%)</b>                                                                      | 11956 (96.8)                        | 35551 (97.5)                       | 11667 (96.1)               |
| <b>Family history of diabetes (%)</b>                                                         | 2367 (19.2)                         | 7019 (19.3)                        | 2358 (19.4)                |
| <b>Family history of cardiovascular diseases (%)</b>                                          | 6726 (54.4)                         | 20796 (57.0)                       | 7196 (59.3)                |
| <b>On-paid work (%)</b>                                                                       | 8331 (67.4)                         | 22289 (61.1)                       | 6361 (52.4)                |
| <b>Drinking status (%)</b>                                                                    |                                     |                                    |                            |
| Never drinker                                                                                 | 372 (3.0)                           | 952 (2.6)                          | 371 (3.1)                  |
| Ever drinker                                                                                  | 365 (3.0)                           | 817 (2.2)                          | 382 (3.2)                  |
| Current drinker                                                                               | 11621 (94.0)                        | 34695 (95.2)                       | 11390 (93.8)               |
| <b>Smoking status (%)</b>                                                                     |                                     |                                    |                            |
| Never smoker                                                                                  | 7212 (58.4)                         | 21802 (59.8)                       | 6627 (54.6)                |
| Ever smoker                                                                                   | 4302 (34.8)                         | 12619 (34.6)                       | 4427 (36.5)                |
| Current smoker                                                                                | 844 (6.8)                           | 2043 (5.6)                         | 1089 (9.0)                 |
| <b>Daily average coffee intake (cups)</b>                                                     | 2.0 (2.0)                           | 1.9 (1.9)                          | 2.0 (2.0)                  |
| <b>Daily average tea intake (cups)</b>                                                        | 3.2 (2.7)                           | 3.3 (2.6)                          | 3.4 (2.8)                  |
| <b>Mediterranean dietary score (points)</b>                                                   | 2.9 (1.4)                           | 2.9 (1.4)                          | 2.9 (1.4)                  |
| <b>Daily average time on moderate to vigorous physical activity per day<sup>d</sup> (min)</b> | 117.0 (53.2)                        | 115.4 (50.5)                       | 104.9 (50.1)               |
| <b>Daily average ambivalent Light exposure<sup>e</sup> (lux)</b>                              | 781.2 (161.6)                       | 803.7 (149.0)                      | 788.3 (154.7)              |
| <b>Daily average ambivalent noise<sup>f</sup> (dB)</b>                                        | 51.2 (4.2)                          | 51.1 (4.1)                         | 51.2 (4.3)                 |
| <b>Circadian and sleep</b>                                                                    |                                     |                                    |                            |
| <b>Chronotype</b>                                                                             |                                     |                                    |                            |
| <b>Early</b>                                                                                  | 2960 (24.0)                         | 9262 (25.4)                        | 3449 (28.4)                |
| <b>Intermediate early</b>                                                                     | 4702 (38.1)                         | 14507 (39.8)                       | 3936 (32.4)                |
| <b>Intermediate late</b>                                                                      | 3485 (28.2)                         | 9944 (27.3)                        | 3334 (27.5)                |
| <b>Late</b>                                                                                   | 1211 (9.8)                          | 2751 (7.5)                         | 1424 (11.7)                |
| <b>Weekly average midsleep<sup>g</sup> (hh:mm)</b>                                            | 02:06 (00:48)                       | 03:18 (00:30)                      | 04:24 (00:48)              |
| <b>Midsleep on weekdays (hh:mm)</b>                                                           | 02:06 (00:54)                       | 03:18 (00:30)                      | 04:36 (00:54)              |
| <b>Midsleep on weekends (hh:mm)</b>                                                           | 02:12 (01:24)                       | 03:24 (00:48)                      | 04:42 (01:06)              |
| <b>Social jetlag<sup>h</sup> (hours)</b>                                                      | 0.1 (1.6)                           | 0.2 (0.8)                          | 0.1 (1.2)                  |

|                                                         |            |           |           |
|---------------------------------------------------------|------------|-----------|-----------|
| <b>Residuals of midsleep on chronotype<sup>b</sup></b>  | -1.2 (0.7) | 0.0 (0.4) | 1.3 (0.6) |
| <b>Healthy sleep quality score (points)<sup>i</sup></b> | 3.2 (0.9)  | 3.3 (0.9) | 3.1 (0.9) |

---

<sup>a</sup> Values are mean and standard deviation or number and percentage.

<sup>b</sup> Circadian misalignment was calculated by the residuals of midsleep on chronotype, while the negative or positive value of circadian misalignment indicated an advanced or delayed real sleep-wake cycle comparing to circadian preference. The first quintile of residuals of midsleep on chronotype was defined as the advanced group, demonstrating an advanced sleep-wake cycle relative to their circadian preference. Conversely, the fifth quintile was defined as the delayed group, which indicated a delayed sleep-wake cycle in comparison to circadian preference. The remaining quintiles (Q2, Q3, Q4) combined together were defined as the intermediate group.

<sup>c</sup> Townsend deprivation index is calculated based on the preceding national census output areas. Each participant is assigned a score corresponding to the output area in which their postcode is located. Higher value indicated a poorer socioeconomic status.

<sup>d</sup> Accelerometer-derived time on moderate or vigorous activity per day, weighted by weekends and weekdays based on R package GGIR<sup>19</sup>.

<sup>e</sup> Accelerometer-derived mean waking hours' light exposure per day based on R package GGIR<sup>19</sup>.

<sup>f</sup> Day-evening-night equivalent noise level: A-weighted local environment annual average noise level measured over the 24-hour period.

<sup>g</sup> Accelerometer-derived time on average midpoint between sleep onset and sleep end, derived and weighted by weekends and weekdays based on R package GGIR<sup>19</sup>.

<sup>h</sup> Difference between accelerometer-derived time of midsleep on weekends and workdays, derived and weighted by weekends and weekdays based on R package GGIR<sup>19</sup>.

<sup>i</sup> The healthy sleep quality score is calculated by the sum of five components (chronotype, 24-hour sleep duration, insomnia, snoring, and daytime sleepiness) from a touchscreen sleep questionnaire. It ranges from 0-5, with a higher score indicating a better sleep quality.

**Table 2. Associations between quintiles of circadian misalignment and cardiometabolic outcomes by Cox proportionate hazard models <sup>a</sup>**

|                               | <b>Incidence density<br/>(events/person-years)</b> | <b>Model 1<sup>b</sup></b> | <b>Model 2<sup>c</sup></b> | <b>Model 3<sup>d</sup></b> |
|-------------------------------|----------------------------------------------------|----------------------------|----------------------------|----------------------------|
| <b>Type 2 diabetes</b>        |                                                    |                            |                            |                            |
| <b>Q1</b>                     | <b>300/94667</b>                                   | <b>1.30 (1.10, 1.54)</b>   | <b>1.26 (1.07, 1.50)</b>   | <b>1.22 (1.03, 1.45)</b>   |
| Q2                            | 244/94046                                          | 1.01 (0.84, 1.20)          | 1.01 (0.85, 1.21)          | 1.02 (0.85, 1.22)          |
| Q3                            | 243/94917                                          | Reference                  | Reference                  | Reference                  |
| Q4                            | 310/96293                                          | 1.19 (1.01, 1.41)          | 1.18 (1.00, 1.39)          | 1.17 (0.99, 1.38)          |
| <b>Q5</b>                     | <b>429/95528</b>                                   | <b>1.59 (1.36, 1.87)</b>   | <b>1.51 (1.29, 1.77)</b>   | <b>1.39 (1.18, 1.62)</b>   |
| <b>Coronary heart disease</b> |                                                    |                            |                            |                            |
| <b>Q1</b>                     | <b>423/92171</b>                                   | <b>1.14 (1.00, 1.31)</b>   | <b>1.13 (0.99, 1.30)</b>   | <b>1.12 (0.98, 1.29)</b>   |
| Q2                            | 364/91674                                          | 0.98 (0.85, 1.13)          | 0.98 (0.85, 1.13)          | 0.98 (0.85, 1.13)          |
| Q3                            | 391/92489                                          | Reference                  | Reference                  | Reference                  |
| <b>Q4</b>                     | <b>482/93398</b>                                   | <b>1.16 (1.02, 1.33)</b>   | <b>1.15 (1.01, 1.32)</b>   | <b>1.15 (1.01, 1.31)</b>   |
| <b>Q5</b>                     | <b>526/92501</b>                                   | <b>1.25 (1.09, 1.42)</b>   | <b>1.22 (1.07, 1.39)</b>   | <b>1.16 (1.02, 1.33)</b>   |
| <b>Stroke</b>                 |                                                    |                            |                            |                            |
| Q1                            | 130/94424                                          | 1.06 (0.83, 1.35)          | 1.06 (0.83, 1.35)          | 1.04 (0.82, 1.33)          |
| Q2                            | 114/93768                                          | 0.91 (0.71, 1.17)          | 0.92 (0.71, 1.18)          | 0.92 (0.72, 1.19)          |
| Q3                            | 133/94636                                          | Reference                  | Reference                  | Reference                  |
| Q4                            | 160/95895                                          | 1.11 (0.89, 1.40)          | 1.11 (0.88, 1.39)          | 1.10 (0.88, 1.39)          |
| Q5                            | 147/95220                                          | 0.99 (0.78, 1.25)          | 0.97 (0.76, 1.22)          | 0.91 (0.72, 1.16)          |
| <b>Cardiometabolic events</b> |                                                    |                            |                            |                            |
| <b>Q1</b>                     | <b>780/91496</b>                                   | <b>1.16 (1.05, 1.29)</b>   | <b>1.15 (1.03, 1.27)</b>   | <b>1.12 (1.02, 1.25)</b>   |
| Q2                            | 675/91071                                          | 0.98 (0.88, 1.09)          | 0.98 (0.88, 1.09)          | 0.98 (0.89, 1.09)          |
| Q3                            | 714/91852                                          | Reference                  | Reference                  | Reference                  |
| <b>Q4</b>                     | <b>884/92598</b>                                   | <b>1.17 (1.06, 1.29)</b>   | <b>1.16 (1.05, 1.28)</b>   | <b>1.15 (1.04, 1.27)</b>   |
| <b>Q5</b>                     | <b>1031/91626</b>                                  | <b>1.33 (1.21, 1.46)</b>   | <b>1.29 (1.17, 1.41)</b>   | <b>1.21 (1.10, 1.33)</b>   |

<sup>a</sup> Circadian misalignment was categorized by quintiles of residuals of midsleep on chronotype, while the negative or positive value of circadian misalignment indicated an advanced or delayed real sleep-wake cycle comparing to circadian preference. Values are hazard ratio and 95% confidence intervals.

<sup>b</sup> Adjusted for age, sex, and ethnic group;

<sup>c</sup> Further adjusted for region, social economic status, employment, education, and ambient noise level;

<sup>d</sup> Further adjusted for smoking status, drinking status, tea consumption, coffee consumption, moderate to vigorous physic activity, and healthy sleep quality score (calculated from chronotype, insomnia, snore, daytime sleepiness, and sleep duration).

**Table 3. Multiple mediation models of potential mediators in the association between circadian misalignment and T2D as well as CHD<sup>a</sup>**

| Potential mediators                          | Total effect      |          | Natural direct effect |          | Natural indirect effect |          | Proportion mediated |          |
|----------------------------------------------|-------------------|----------|-----------------------|----------|-------------------------|----------|---------------------|----------|
|                                              | HR (95%CI)        | <i>P</i> | HR (95%CI)            | <i>P</i> | HR (95%CI)              | <i>P</i> | % (95%CI)           | <i>P</i> |
| <b>T2D</b>                                   |                   |          |                       |          |                         |          |                     |          |
| <b>Liver function</b>                        |                   |          |                       |          |                         |          |                     |          |
| Alanine aminotransferase (U/L)               | 1.15 (1.08, 1.21) | <.001    | 1.14 (1.07, 1.20)     | <.001    | 1.01 (1.00, 1.01)       | <.001    | 6.2 (3.1, 12.6)     | <.001    |
| Alkaline phosphatase (U/L)                   | 1.16 (1.08, 1.23) | <.001    | 1.15 (1.08, 1.22)     | <.001    | 1.01 (1.00, 1.01)       | <.001    | 4.6 (2.4, 8.4)      | <.001    |
| Aspartate aminotransferase (U/L)             | 1.15 (1.08, 1.23) | <.001    | 1.15 (1.08, 1.22)     | <.001    | 1.00 (1.00, 1.01)       | 0.02     | 3.0 (0.8, 6.0)      | 0.02     |
| Gamma glutamyl transferase (U/L)             | 1.15 (1.08, 1.21) | <.001    | 1.13 (1.06, 1.19)     | <.001    | 1.01 (1.01, 1.02)       | <.001    | 9.1 (5.3, 18.7)     | <.001    |
| Total bilirubin (μmol/L)                     | 1.16 (1.09, 1.22) | <.001    | 1.16 (1.09, 1.21)     | <.001    | 1.00 (1.00, 1.01)       | <.001    | 2.4 (1.1, 5.0)      | 0.001    |
| <b>Overall</b>                               | 1.15 (1.09, 1.23) | <.001    | 1.14 (1.07, 1.21)     | <.001    | 1.02 (1.01, 1.02)       | <.001    | 12.3 (7.1, 20.0)    | <.001    |
| <b>Lipid and glucose metabolism</b>          |                   |          |                       |          |                         |          |                     |          |
| HDL-C (mmol/L)                               | 1.17 (1.09, 1.23) | <.001    | 1.15 (1.08, 1.21)     | <.001    | 1.01 (1.01, 1.02)       | <.001    | 10.0 (6.1, 18.5)    | <.001    |
| Triglycerides (mmol/L)                       | 1.15 (1.09, 1.22) | <.001    | 1.14 (1.07, 1.20)     | <.001    | 1.01 (1.01, 1.02)       | <.001    | 9.8 (4.8, 20.1)     | <.001    |
| Apolipoprotein A (g/L)                       | 1.16 (1.09, 1.23) | <.001    | 1.15 (1.08, 1.22)     | <.001    | 1.01 (1.00, 1.01)       | <.001    | 5.9 (3.1, 11.0)     | 0.001    |
| HbA1c (%)                                    | 1.15 (1.07, 1.22) | <.001    | 1.12 (1.05, 1.19)     | <.001    | 1.02 (1.01, 1.04)       | <.001    | 16.9 (5.2, 34.0)    | <.001    |
| <b>Overall</b>                               | 1.15 (1.09, 1.24) | <.001    | 1.11 (1.05, 1.20)     | <.001    | 1.03 (1.02, 1.05)       | <.001    | 24.5 (12.3, 41.1)   | <.001    |
| <b>Inflammatory biomarkers</b>               |                   |          |                       |          |                         |          |                     |          |
| C-reactive protein (mg/L)                    | 1.16 (1.10, 1.22) | <.001    | 1.14 (1.07, 1.19)     | <.001    | 1.02 (1.02, 1.03)       | <.001    | 15.5 (11.0, 28.1)   | <.001    |
| White blood cell count (x10 <sup>9</sup> /L) | 1.16 (1.09, 1.22) | <.001    | 1.15 (1.07, 1.20)     | <.001    | 1.01 (1.01, 1.02)       | <.001    | 8.8 (6.2, 17.4)     | <.001    |
| <b>Overall</b>                               | 1.16 (1.09, 1.23) | <.001    | 1.13 (1.06, 1.20)     | <.001    | 1.03 (1.02, 1.04)       | <.001    | 20.0 (13.9, 37.0)   | <.001    |
| <b>Anthropometric indices</b>                |                   |          |                       |          |                         |          |                     |          |
| Systolic blood pressure (mmHg)               | 1.16 (1.09, 1.23) | <.001    | 1.15 (1.08, 1.22)     | 0.02     | 1.01 (1.00, 1.01)       | 0.02     | 3.7 (1.1, 8.3)      | 0.002    |
| Body mass index (kg/m <sup>2</sup> )         | 1.15 (1.07, 1.22) | <.001    | 1.10 (1.03, 1.16)     | 0.02     | 1.05 (1.04, 1.06)       | <.001    | 35.2 (23.9, 62.2)   | <.001    |

|                                              |                   |       |                   |       |                   |       |                   |       |
|----------------------------------------------|-------------------|-------|-------------------|-------|-------------------|-------|-------------------|-------|
| Waist-hip ratio                              | 1.16 (1.08, 1.23) | <.001 | 1.11 (1.04, 1.18) | <.001 | 1.04 (1.03, 1.05) | <.001 | 27.1 (17.7, 47.7) | <.001 |
| <b>Overall</b>                               | 1.15 (1.08, 1.23) | <.001 | 1.08 (1.01, 1.15) | 0.02  | 1.06 (1.05, 1.07) | <.001 | 44.6 (31.7, 81.8) | <.001 |
| <b>CHD</b>                                   |                   |       |                   |       |                   |       |                   |       |
| <b>Liver function</b>                        |                   |       |                   |       |                   |       |                   |       |
| Alanine aminotransferase (U/L)               | 1.09 (1.03, 1.16) | <.001 | 1.09 (1.03, 1.15) | <.001 | 1.00 (1.00, 1.00) | <.001 | 1.5 (0.3, 4.2)    | <.001 |
| Alkaline phosphatase (U/L)                   | 1.09 (1.03, 1.16) | 0.02  | 1.09 (1.03, 1.15) | 0.02  | 1.00 (1.00, 1.01) | <.001 | 4.4 (1.8, 12.7)   | 0.02  |
| Gamma glutamyl transferase (U/L)             | 1.09 (1.03, 1.16) | <.001 | 1.09 (1.03, 1.15) | <.001 | 1.00 (1.00, 1.00) | <.001 | 3.4 (1.5, 11.0)   | <.001 |
| Albumin (g/L)                                | 1.10 (1.02, 1.16) | 0.04  | 1.09 (1.02, 1.16) | 0.04  | 1.00 (1.00, 1.00) | <.001 | 2.1 (0.5, 6.9)    | 0.04  |
| <b>Overall</b>                               | 1.09 (1.04, 1.15) | <.001 | 1.08 (1.03, 1.14) | <.001 | 1.01 (1.01, 1.01) | <.001 | 8.8 (5.0, 22.6)   | <.001 |
| <b>Lipid and glucose metabolism</b>          |                   |       |                   |       |                   |       |                   |       |
| HDL-C (mmol/L)                               | 1.10 (1.04, 1.16) | 0.02  | 1.09 (1.03, 1.15) | 0.02  | 1.01 (1.00, 1.01) | <.001 | 6.2 (2.7, 14.8)   | 0.02  |
| Triglycerides (mmol/L)                       | 1.10 (1.04, 1.16) | 0.02  | 1.09 (1.03, 1.16) | 0.02  | 1.01 (1.00, 1.01) | <.001 | 4.0 (1.6, 9.9)    | 0.02  |
| Apolipoprotein A (g/L)                       | 1.10 (1.04, 1.16) | 0.02  | 1.09 (1.03, 1.16) | 0.02  | 1.01 (1.00, 1.01) | <.001 | 4.5 (1.7, 13.1)   | 0.02  |
| HbA1c (%)                                    | 1.09 (1.03, 1.16) | 0.02  | 1.09 (1.03, 1.15) | 0.02  | 1.00 (1.00, 1.00) | <.001 | 2.8 (0.4, 7.5)    | 0.02  |
| <b>Overall</b>                               | 1.09 (1.04, 1.17) | <.001 | 1.09 (1.03, 1.16) | <.001 | 1.01 (1.00, 1.01) | <.001 | 9.1 (4.5, 20.6)   | <.001 |
| <b>Inflammatory biomarkers</b>               |                   |       |                   |       |                   |       |                   |       |
| C-reactive protein (mg/L)                    | 1.10 (1.04, 1.16) | <.001 | 1.09 (1.03, 1.15) | <.001 | 1.01 (1.01, 1.01) | <.001 | 10.7 (6.2, 27.1)  | <.001 |
| White blood cell count (x10 <sup>9</sup> /L) | 1.09 (1.04, 1.16) | <.001 | 1.09 (1.03, 1.15) | <.001 | 1.01 (1.00, 1.01) | <.001 | 5.8 (2.7, 14.5)   | <.001 |
| <b>Overall</b>                               | 1.09 (1.03, 1.16) | <.001 | 1.08 (1.02, 1.14) | <.001 | 1.01 (1.01, 1.02) | <.001 | 13.7 (7.1, 38.5)  | <.001 |
| <b>Anthropometric indices</b>                |                   |       |                   |       |                   |       |                   |       |
| Systolic blood pressure (mmHg)               | 1.10 (1.04, 1.16) | 0.02  | 1.09 (1.03, 1.16) | 0.02  | 1.00 (1.00, 1.01) | 0.02  | 4.6 (0.7, 12.7)   | 0.04  |
| Body mass index (kg/m <sup>2</sup> )         | 1.09 (1.03, 1.16) | 0.02  | 1.08 (1.02, 1.14) | 0.04  | 1.01 (1.01, 1.02) | <.001 | 16.8 (9.3, 44.2)  | 0.02  |
| Waist-hip ratio                              | 1.09 (1.03, 1.16) | 0.02  | 1.08 (1.02, 1.15) | 0.04  | 1.01 (1.01, 1.01) | <.001 | 11.9 (6.0, 29.7)  | 0.02  |
| <b>Overall</b>                               | 1.09 (1.03, 1.15) | 0.02  | 1.08 (1.01, 1.13) | 0.02  | 1.02 (1.01, 1.02) | <.001 | 20.3 (11.5, 63.7) | 0.02  |



<sup>a</sup> Models were adjusted for age, sex, region, ethnic group, social economic status, employment, education, daily average noise level, smoking status, drinking status, tea consumption, coffee consumption, moderate to vigorous physic activity, and healthy sleep quality score. The levels of biomarkers were nature log transformed. Mediation analyses were conducted by R package CMAverse.

Abbreviation: T2D, type 2 diabetes, CHD, coronary heart diseases, HR (95%CI), hazard ratio (95% confidence limit).

**Figure 1. Flow chart of the study**

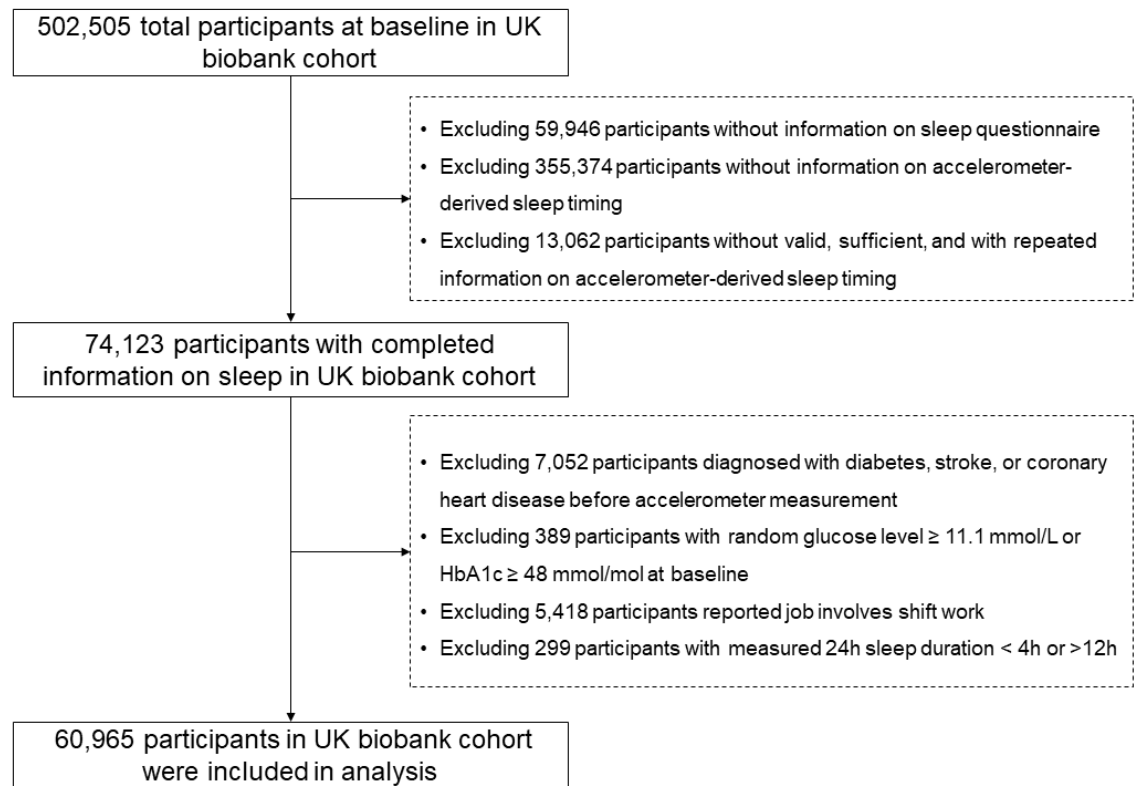

**Figure 2** The risk of circadian preference, midsleep, and circadian misalignment on cardiometabolic outcomes

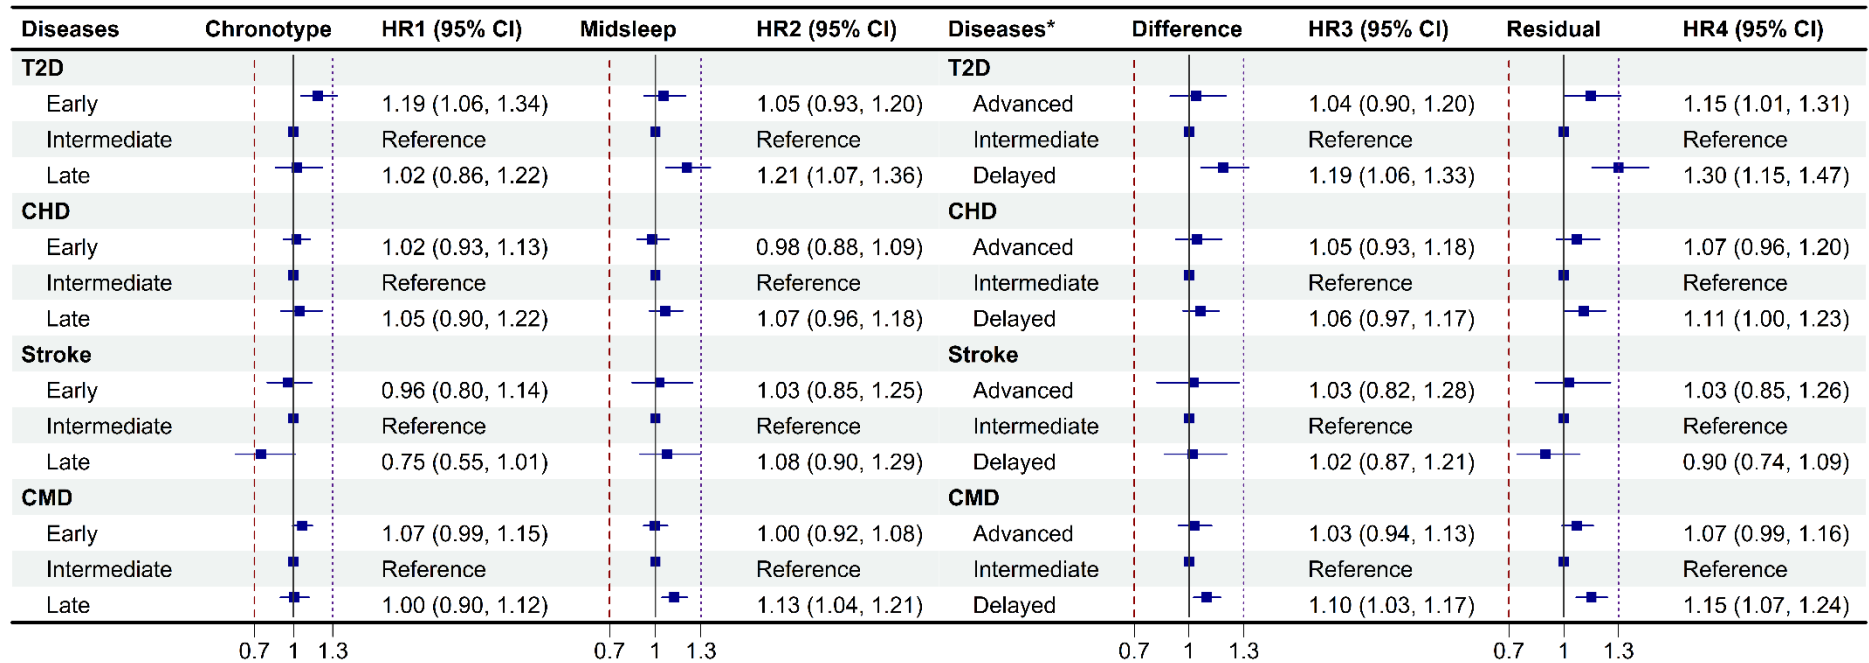

Chronotype indicated circadian preference of participants. Difference was calculated by subtracting chronotype group (early, intermediate, and late) from midsleep group (early, intermediate, and late), while Residual was calculated by the residuals of midsleep (continuous variable) on chronotype. Models were adjusted for age, sex, region, social economic status, employment, education, ethnic group, daily average noise level, smoking status, drinking status, tea consumption, coffee

consumption, moderate to vigorous physical activity, and healthy sleep quality score (chronotype was omitted from healthy sleep quality score when analyzing the association between chronotype and cardiometabolic outcomes). Chronotype and midsleep were also mutually adjusted.

\*The category of circadian difference and residuals are different from chronotype and midsleep. Participants can be categorized into early, intermediate, and late group by chronotype and midsleep, whereas they were categorized into advanced, intermediate, and delayed sleep-wake cycle group compare to their chronotype. Abbreviation: T2D, Type 2 diabetes; CHD, coronary heart diseases; CMD, cardiometabolic diseases (incident of any of T2D, CHD, and Stroke), HR (95%CI), hazard ratio and 95% confidence limit.
